# Supplementary material for: Femoroacetabular impingement syndrome and labral injuries: grading the evidence on diagnosis and non-operative treatment—a statement paper commissioned by the Danish Society of Sports Physical Therapy (DSSF)
Source: HighWire-hosted journal article supplement (doi:10.1136/bjsports-2021-104060), 2021-09-16
Supplement: bjsports-2021-104060supp003_data_supplement.pdf [file bjsports-2021-104060supp003_data_supplement.pdf]

**Table 1. Risk of bias assessment and GRADE of clinical tests for diagnosing femoroacetabular impingement / acetabular labral tear**

| Diagnosis                                                                                                                                                        |                      |                           |                           | QUADAS 2          |            |                    |               |                       |            |                    | GRADE (outcome level) |              |              |               |                    |                  |                       |   |   |   |   |   |   |   |    |
|------------------------------------------------------------------------------------------------------------------------------------------------------------------|----------------------|---------------------------|---------------------------|-------------------|------------|--------------------|---------------|-----------------------|------------|--------------------|-----------------------|--------------|--------------|---------------|--------------------|------------------|-----------------------|---|---|---|---|---|---|---|----|
| Femoroacetabular Impingement (FAI) / Acetabular Labral Tear (ALT) (Studies where tests are diagnosing internal hip pathology specified as either FAI and/or ALT) |                      |                           |                           | Risk of Bias      |            |                    |               | Applicability Concern |            |                    |                       |              |              |               |                    |                  |                       |   |   |   |   |   |   |   |    |
| Index test                                                                                                                                                       | Study                | Reference standard        | Likelihood ratio          | Patient Selection | Index Test | Reference Standard | Flow & Timing | Patient Selection     | Index Test | Reference Standard | Study design          | Risk of bias | Indirectness | Inconsistency | Imprecise evidence | Publication bias | Downgrade **          |   |   |   |   |   |   |   |    |
| FADIR                                                                                                                                                            | Reiman et al.[1]     | MRA                       | LR+                       | ✓                 | ✗          | ✗                  | ✗             | ✓                     | ✓          | ✓                  | ✓                     | ✗            | ✗            | ✗             | ✓ (LR+)<br>✗ (LR-) | ✓                | ↓↓ (LR+)<br>↓↓↓ (LR-) |   |   |   |   |   |   |   |    |
|                                                                                                                                                                  |                      |                           | LR-                       | ✓                 | ✗          | ✗                  | ✗             | ✓                     | ✓          | ✓                  |                       |              |              |               |                    |                  |                       |   |   |   |   |   |   |   |    |
|                                                                                                                                                                  |                      |                           | LR+                       | ✓                 | ✗          | ✓                  | ✗             | ✓                     | ✓          | ✓                  |                       |              |              |               |                    |                  |                       |   |   |   |   |   |   |   |    |
|                                                                                                                                                                  |                      |                           | LR-                       | ✗                 | ✓          | ✓                  | ?             | ✓                     | ✓          | ✓                  |                       |              |              |               |                    |                  |                       |   |   |   |   |   |   |   |    |
|                                                                                                                                                                  |                      |                           | LR+                       | ✗                 | ✗          | ✗                  | ✓             | ✗                     | ✓          | ✗                  |                       |              |              |               |                    |                  |                       |   |   |   |   |   |   |   |    |
|                                                                                                                                                                  |                      |                           | LR-                       | ✗                 | ✗          | ✗                  | ✓             | ✗                     | ✓          | ✗                  |                       |              |              |               |                    |                  |                       |   |   |   |   |   |   |   |    |
|                                                                                                                                                                  | Reiman et al.[1]     | Surgery                   | LR+                       | ✓                 | ✗          | ✓                  | ✗             | ✗                     | ✓          | ✓                  |                       |              |              |               |                    |                  |                       | ✓ |   |   |   |   |   |   |    |
|                                                                                                                                                                  |                      |                           | LR-                       | ✗                 | ✗          | ✗                  | ✓             | ✗                     | ✓          | ✓                  |                       |              |              |               |                    |                  |                       |   |   |   |   |   |   |   |    |
|                                                                                                                                                                  |                      |                           | LR+                       | ✓                 | ✗          | ✗                  | ?             | ✓                     | ✓          | ✓                  |                       |              |              |               |                    |                  |                       |   |   |   |   |   |   |   |    |
|                                                                                                                                                                  |                      |                           | LR-                       | ✗                 | ✗          | ✗                  | ✓             | ✓                     | ✓          | ✓                  |                       |              |              |               |                    |                  |                       |   |   |   |   |   |   |   |    |
|                                                                                                                                                                  | Martin et al.[9]     | Intra-articular injection | LR+                       | ✓                 | ✗          | ✗                  | ?             | ✓                     | ✓          | ✗                  |                       |              |              |               |                    |                  |                       |   |   |   |   |   |   |   |    |
|                                                                                                                                                                  |                      |                           | LR-                       | ✓                 | ✗          | ✗                  | ?             | ✓                     | ✓          | ✗                  |                       |              |              |               |                    |                  |                       |   |   |   |   |   |   |   |    |
|                                                                                                                                                                  | FABER                | Maslowski et al.[10]      | Intra-articular injection | LR+               | ✗          | ✓                  | ✗             | ✓                     | ✓          | ✓                  |                       |              |              |               |                    |                  |                       | ✗ | ✓ | ✗ | ✗ | ✓ | ✓ | ✓ | ↓↓ |
|                                                                                                                                                                  |                      |                           |                           | LR-               | ✓          | ✗                  | ?             | ?                     | ✓          | ✓                  |                       |              |              |               |                    |                  |                       | ✓ |   |   |   |   |   |   |    |
| Maslowski et al.[10]                                                                                                                                             |                      | X-ray, MRI, MRA           | LR+                       | ✓                 | ✗          | ?                  | ?             | ✓                     | ✓          | ✓                  |                       |              |              |               |                    |                  |                       |   |   |   |   |   |   |   |    |
|                                                                                                                                                                  |                      |                           | LR-                       | ✓                 | ✗          | ?                  | ?             | ✓                     | ✓          | ✓                  |                       |              |              |               |                    |                  |                       |   |   |   |   |   |   |   |    |
| Martin et al.[9]                                                                                                                                                 |                      | Intra-articular injection | LR+                       | ✓                 | ✗          | ✗                  | ?             | ✓                     | ✓          | ✗                  |                       |              |              |               |                    |                  |                       |   |   |   |   |   |   |   |    |
|                                                                                                                                                                  |                      |                           | LR-                       | ✓                 | ✗          | ✗                  | ?             | ✓                     | ✓          | ✗                  |                       |              |              |               |                    |                  |                       |   |   |   |   |   |   |   |    |
| Tijssen et al.[11]                                                                                                                                               | Surgery              | LR+                       | ✓                         | ✓                 | ?          | ?                  | ✓             | ✓                     | ✓          |                    |                       |              |              |               |                    |                  |                       |   |   |   |   |   |   |   |    |
|                                                                                                                                                                  |                      | N/A                       |                           |                   |            |                    |               |                       |            |                    |                       |              |              |               |                    |                  |                       |   |   |   |   |   |   |   |    |
| Internal rotation over pressure                                                                                                                                  | Maslowski et al.[10] | Intra-articular injection | LR+                       | ✗                 | ✓          | ✗                  | ✓             | ✓                     | ✓          | ✗                  | ✓                     | ✗            | ✗            | ✓             | ✓                  | ?                | ↓↓                    |   |   |   |   |   |   |   |    |
|                                                                                                                                                                  |                      |                           | LR-                       | ✓                 | ✗          | ?                  | ?             | ✓                     | ✓          | ✓                  |                       |              |              |               |                    |                  |                       |   |   |   |   |   |   |   |    |
|                                                                                                                                                                  | Maslowski et al.[10] | X-ray, MRI, MRA           | LR+                       | ✓                 | ✗          | ?                  | ?             | ✓                     | ✓          | ✓                  |                       |              |              |               |                    |                  |                       |   |   |   |   |   |   |   |    |
|                                                                                                                                                                  |                      |                           | LR-                       | ✓                 | ✗          | ?                  | ?             | ✓                     | ✓          | ✓                  |                       |              |              |               |                    |                  |                       |   |   |   |   |   |   |   |    |
| Resisted straight leg raise test                                                                                                                                 | Maslowski et al.[10] | Intra-articular injection | LR+                       | ✗                 | ✓          | ✗                  | ✓             | ✓                     | ✓          | ✗                  | ✓                     | ✗            | ✗            | ✓             | ✓                  | ?                | ↓↓                    |   |   |   |   |   |   |   |    |
|                                                                                                                                                                  |                      |                           | LR-                       | ✓                 | ✗          | ?                  | ?             | ✓                     | ✓          | ✓                  |                       |              |              |               |                    |                  |                       |   |   |   |   |   |   |   |    |
|                                                                                                                                                                  | Maslowski et al.[10] | X-ray, MRI, MRA           | LR+                       | ✓                 | ✗          | ?                  | ?             | ✓                     | ✓          | ✓                  |                       |              |              |               |                    |                  |                       |   |   |   |   |   |   |   |    |
|                                                                                                                                                                  |                      |                           | LR-                       | ✓                 | ✗          | ?                  | ?             | ✓                     | ✓          | ✓                  |                       |              |              |               |                    |                  |                       |   |   |   |   |   |   |   |    |
|                                                                                                                                                                  | Tijssen et al.[11]   | Surgery                   | LR+                       | ✓                 | ✓          | ?                  | ?             | ✓                     | ✓          | ✓                  |                       |              |              |               |                    |                  |                       |   |   |   |   |   |   |   |    |
|                                                                                                                                                                  |                      |                           | LR-                       | ✓                 | ✓          | ?                  | ?             | ✓                     | ✓          | ✓                  |                       |              |              |               |                    |                  |                       |   |   |   |   |   |   |   |    |

| Table 1 continued. Risk of bias assessment and GRADE of clinical tests for diagnosing femoroacetabular impingement / acetabular labral tear                           |                      |                           |                  |                   |            |                    |               |                       |            |                    |                       |              |              |               |                    |                  |             |
|-----------------------------------------------------------------------------------------------------------------------------------------------------------------------|----------------------|---------------------------|------------------|-------------------|------------|--------------------|---------------|-----------------------|------------|--------------------|-----------------------|--------------|--------------|---------------|--------------------|------------------|-------------|
| Diagnosis                                                                                                                                                             |                      |                           |                  | QUADAS 2          |            |                    |               |                       |            |                    | GRADE (outcome level) |              |              |               |                    |                  |             |
| Femoroacetabular Impingement (FAI) and/or Acetabular Labral Tear (ALT) (Studies where tests are diagnosing internal hip pathology specified as either FAI and/or ALT) |                      |                           |                  | Risk of Bias      |            |                    |               | Applicability Concern |            |                    |                       |              |              |               |                    |                  |             |
| Index test                                                                                                                                                            | Study                | Reference standard        | Likelihood ratio | Patient Selection | Index Test | Reference Standard | Flow & Timing | Patient Selection     | Index Test | Reference Standard | Study design          | Risk of bias | Indirectness | Inconsistency | Imprecise evidence | Publication bias | Downgrade** |
| Scour test                                                                                                                                                            | Maslowski et al.[10] | Intra-articular injection | LR+              | ×                 | ✓          | ×                  | ✓             | ✓                     | ✓          | ×                  | ✓                     | ×            | ×            | ✓             | ×                  | ?                | ↓↓↓         |
|                                                                                                                                                                       |                      |                           | LR-              |                   |            |                    |               |                       |            |                    |                       |              |              |               |                    |                  |             |
|                                                                                                                                                                       | Maslowski et al.[10] | X-ray, MRI, MRA           | LR+              | ✓                 | ×          | ?                  | ?             | ✓                     | ✓          | ✓                  |                       |              |              |               |                    |                  |             |
|                                                                                                                                                                       |                      |                           | LR-              |                   |            |                    |               |                       |            |                    |                       |              |              |               |                    |                  |             |
| Trochanteric tenderness                                                                                                                                               | Martin et al.[9]     | Intra-articular injection | LR+              | ✓                 | ×          | ×                  | ?             | ✓                     | ✓          | ×                  | ✓                     | ×            | ×            | ✓             | ×                  | ?                | ↓↓↓         |
|                                                                                                                                                                       |                      |                           | LR-              |                   |            |                    |               |                       |            |                    |                       |              |              |               |                    |                  |             |
| Anterior impingement test                                                                                                                                             | Tijssen et al.[11]   | Surgery                   | LR+              | ✓                 | ✓          | ?                  | ?             | ✓                     | ✓          | ✓                  | ✓                     | ?            | ×            | ✓             | ✓                  | ?                | ↓           |
|                                                                                                                                                                       |                      |                           | N/A              |                   |            |                    |               |                       |            |                    |                       |              |              |               |                    |                  |             |
| "Catching"                                                                                                                                                            | Martin et al.[9]     | Intra-articular injection | LR+              | ✓                 | ×          | ×                  | ?             | ✓                     | ✓          | ×                  | ✓                     | ×            | ×            | ✓             | ✓ (LR+)            | ?                | ↓↓ (LR+)    |
|                                                                                                                                                                       |                      |                           | LR-              |                   |            |                    |               |                       |            |                    |                       |              |              |               | ×                  | ↓ (LR-)          |             |
| "Pinching pain when sitting"                                                                                                                                          | Martin et al.[9]     | Intra-articular injection | LR+              | ✓                 | ×          | ×                  | ?             | ✓                     | ✓          | ×                  | ✓                     | ×            | ×            | ✓             | ✓ (LR+)            | ?                | ↓↓ (LR+)    |
|                                                                                                                                                                       |                      |                           | LR-              |                   |            |                    |               |                       |            |                    |                       |              |              |               | ×                  | ↓ (LR-)          |             |
| "Lack of lateral thigh pain"                                                                                                                                          | Martin et al.[9]     | Intra-articular injection | LR+              | ✓                 | ×          | ×                  | ?             | ✓                     | ✓          | ×                  | ✓                     | ×            | ×            | ✓             | ✓ (LR+)            | ?                | ↓↓ (LR+)    |
|                                                                                                                                                                       |                      |                           | LR-              |                   |            |                    |               |                       |            |                    |                       |              |              |               | ×                  | ↓ (LR-)          |             |
| "Groin pain"                                                                                                                                                          | Martin et al.[9]     | Intra-articular injection | N/A              | ✓                 | ×          | ×                  | ?             | ✓                     | ✓          | ×                  | ✓                     | ×            | ×            | ×             | ×                  | ?                | ↓↓↓         |
|                                                                                                                                                                       |                      |                           | LR-              |                   |            |                    |               |                       |            |                    |                       |              |              |               |                    |                  |             |
|                                                                                                                                                                       | Tijssen et al.[11]   | Surgery                   | LR+              | ✓                 | ✓          | ?                  | ?             | ✓                     | ✓          | ✓                  |                       |              |              |               |                    |                  |             |
|                                                                                                                                                                       |                      |                           | LR-              |                   |            |                    |               |                       |            |                    |                       |              |              |               |                    |                  |             |
| "Perceived stiffness in the hip"                                                                                                                                      | Tijssen et al.[11]   | Surgery                   | LR+              | ✓                 | ✓          | ?                  | ?             | ✓                     | ✓          | ✓                  | ✓                     | ?            | ×            | ✓             | ✓                  | ?                | ↓           |
|                                                                                                                                                                       |                      |                           | N/A              |                   |            |                    |               |                       |            |                    |                       |              |              |               |                    |                  |             |
| "Perceived mobility restrictions"                                                                                                                                     | Tijssen et al.[11]   | Surgery                   | N/A              | ✓                 | ✓          | ?                  | ?             | ✓                     | ✓          | ✓                  | ✓                     | ?            | ×            | ✓             | ✓                  | ?                | ↓           |
|                                                                                                                                                                       |                      |                           | LR-              |                   |            |                    |               |                       |            |                    |                       |              |              |               |                    |                  |             |
| "Giving way"                                                                                                                                                          | Tijssen et al.[11]   | Surgery                   | N/A              | ✓                 | ✓          | ?                  | ?             | ✓                     | ✓          | ✓                  | ✓                     | ?            | ×            | ✓             | ✓                  | ?                | ↓           |
|                                                                                                                                                                       |                      |                           | LR-              |                   |            |                    |               |                       |            |                    |                       |              |              |               |                    |                  |             |
| "Locking"                                                                                                                                                             | Tijssen et al.[11]   | Surgery                   | N/A              | ✓                 | ✓          | ?                  | ?             | ✓                     | ✓          | ✓                  | ✓                     | ?            | ×            | ✓             | ✓                  | ?                | ↓           |
|                                                                                                                                                                       |                      |                           | LR-              |                   |            |                    |               |                       |            |                    |                       |              |              |               |                    |                  |             |

Abbreviations: MRI (magnetic resonance imaging); US (ultrasound); LR+ (Positive likelihood ratio); LR- (negative likelihood ratio); N/A (not applicable)

\*Item 1: Was a consecutive or random sample of patients enrolled? Item 2: Was a case-control design avoided? Item 3: Did the study avoid inappropriate exclusions? Item 4: Were the index test results interpreted without knowledge of the results of the reference standard? Item 5: If a threshold was used, was it pre-specified? Item 6: Is the reference standard likely to correctly classify the target condition? Item 7: Were the reference standard results interpreted without knowledge of the results of the index test? Item 8: Was there an appropriate interval between index test(s) and reference standard? Item 9: Did all patients receive a reference standard? Item 10: Did patients receive the same reference standard? Item 11: Were all patients included in the analysis?

Quadas 2 risk of bias assessment: × item not fulfilled; ✓ = item fulfilled; ? unclear or unknown if item is fulfilled

GRADE assessments: × = item cause for possible downgrade once; ×× = item cause for possible downgrade twice; ✓ = item fulfilled, no downgrading; ? = item unclear or not available, no upgrading or downgrading.

\*\* ↓ = downgrade quality by one level; ↓↓ = downgrade quality by two levels; ↓↓↓ = downgrade quality by three levels; ↔ = no downgrade

**Table 2. Risk of bias assessment and GRADE of clinical tests for diagnosing femoroacetabular impingement**

| Diagnosis                                                                                                                   |                                             |                                             |                  | QUADAS 2          |            |                    |               |                       |            |                    | GRADE (outcome level) |              |              |               |                    |                  |                       |
|-----------------------------------------------------------------------------------------------------------------------------|---------------------------------------------|---------------------------------------------|------------------|-------------------|------------|--------------------|---------------|-----------------------|------------|--------------------|-----------------------|--------------|--------------|---------------|--------------------|------------------|-----------------------|
| Femoroacetabular Impingement (FAI) (Studies where tests are diagnosing internal hip pathology specified as FAI and/or FAIS) |                                             |                                             |                  | Risk of Bias      |            |                    |               | Applicability Concern |            |                    |                       |              |              |               |                    |                  |                       |
| Index test                                                                                                                  | Study                                       | Reference standard                          | Likelihood ratio | Patient Selection | Index Test | Reference Standard | Flow & Timing | Patient Selection     | Index Test | Reference Standard | Study design          | Risk of bias | Indirectness | Inconsistency | Imprecise evidence | Publication bias | Downgrade **          |
| FADIR                                                                                                                       | Domayer et al.[12]                          | MRI                                         | LR+              | ✗                 | ✗          | ✗                  | ✓             | ✓                     | ✓          | ✓                  | ✓                     | ✗            |              |               | ✓ (LR+)<br>✗ (LR-) | ✓                | ↓↓ (LR+)<br>↓↓↓ (LR-) |
|                                                                                                                             |                                             |                                             | LR-              |                   |            |                    |               |                       |            |                    |                       |              |              |               |                    |                  |                       |
|                                                                                                                             | Hananouchi et al.[13]                       | MRI                                         | LR+              | ✓                 | ✗          | ✗                  | ✗             | ✓                     | ✓          | ✓                  |                       |              |              |               |                    |                  |                       |
|                                                                                                                             |                                             |                                             | LR-              |                   |            |                    |               |                       |            |                    |                       |              |              |               |                    |                  |                       |
|                                                                                                                             | Sink et al.[14]                             | X-Ray                                       | LR+              | ✓                 | ✓          | ✗                  | ✗             | ✓                     | ✓          | ✓                  |                       |              |              |               |                    |                  |                       |
|                                                                                                                             |                                             |                                             | LR-              |                   |            |                    |               |                       |            |                    |                       |              |              |               |                    |                  |                       |
|                                                                                                                             | Ranawat et al.[15]                          | X-Ray                                       | LR+              | ?                 | ?          | ✓                  | ✓             | ✓                     | ?          | ✓                  |                       |              |              |               |                    |                  |                       |
|                                                                                                                             |                                             |                                             | LR-              |                   |            |                    |               |                       |            |                    |                       |              |              |               |                    |                  |                       |
|                                                                                                                             | Pålsson et al.[16]                          | Symptoms, X-Ray & Intra-articular injection | LR+              | ✓                 | ✓          | ✓                  | ✓             | ✓                     | ✓          | ✓                  |                       |              |              |               |                    |                  |                       |
|                                                                                                                             |                                             |                                             | LR-              |                   |            |                    |               |                       |            |                    |                       |              |              |               |                    |                  |                       |
| Owusu-Akyaw et al.[17]                                                                                                      | FAIS diagnosis*                             | LR+                                         | ?                | ?                 | ?          | ✗                  | ?             | ?                     | ✓          |                    |                       |              |              |               |                    |                  |                       |
|                                                                                                                             |                                             | LR-                                         |                  |                   |            |                    |               |                       |            |                    |                       |              |              |               |                    |                  |                       |
| Peters et al.[7]                                                                                                            | Surgery                                     | LR+                                         | ✓                | ✗                 | ✗          | ?                  | ✓             | ✓                     | ✓          |                    |                       |              |              |               |                    |                  |                       |
|                                                                                                                             |                                             | LR-                                         |                  |                   |            |                    |               |                       |            |                    |                       |              |              |               |                    |                  |                       |
| Aprato et al.[2]                                                                                                            | MRA                                         | LR+                                         | ✓                | ✗                 | ✗          | ✗                  | ✓             | ✓                     | ✓          |                    |                       |              |              |               |                    |                  |                       |
|                                                                                                                             |                                             | LR-                                         |                  |                   |            |                    |               |                       |            |                    |                       |              |              |               |                    |                  |                       |
| Barton et al.[18]                                                                                                           | MRA                                         | LR+                                         | ✗                | ?                 | ✗          | ✓                  | ✓             | ✓                     | ✓          |                    |                       |              |              |               |                    |                  |                       |
|                                                                                                                             |                                             | LR-                                         |                  |                   |            |                    |               |                       |            |                    |                       |              |              |               |                    |                  |                       |
| Flex int rotation                                                                                                           | Nogier et al.[19]                           | X-Ray                                       | LR+              | ✓                 | ✓          | ?                  | ?             | ✓                     | ✓          | ?                  | ✓                     | ✓            | ✗            | ✓             | ✓                  | ✓                | ↓                     |
|                                                                                                                             |                                             |                                             | LR-              |                   |            |                    |               |                       |            |                    |                       |              |              |               |                    |                  |                       |
| Pålsson et al.[16]                                                                                                          | Symptoms, X-Ray & Intra-articular injection | LR+                                         | ✓                | ✓                 | ✓          | ✓                  | ✓             | ✓                     | ✓          | ✓                  |                       |              |              |               |                    |                  |                       |
|                                                                                                                             |                                             | LR-                                         |                  |                   |            |                    |               |                       |            |                    |                       |              |              |               |                    |                  |                       |
| FABER                                                                                                                       | Trindade et al.[20]                         | X-Ray                                       | LR+              | ✓                 | ?          | ?                  | ✓             | ✓                     | ?          | ?                  | ✓                     | ✓            |              | ✓             | ✓                  | ✓                | ↓ (LR+)<br>↓ (LR-)    |
|                                                                                                                             |                                             |                                             | LR-              |                   |            |                    |               |                       |            |                    |                       |              |              |               |                    |                  |                       |
|                                                                                                                             | Pålsson et al.[16]                          | Symptoms, X-Ray & Intra-articular injection | LR+              | ✓                 | ✓          | ✓                  | ✓             | ✓                     | ✓          | ✓                  |                       |              |              |               |                    |                  |                       |
| LR-                                                                                                                         |                                             |                                             |                  |                   |            |                    |               |                       |            |                    |                       |              |              |               |                    |                  |                       |
| Owusu-Akyaw et al.[17]                                                                                                      | FAIS diagnosis*                             | LR+                                         | ?                | ?                 | ?          | ✗                  | ?             | ?                     | ✓          |                    |                       |              |              |               |                    |                  |                       |
|                                                                                                                             |                                             | LR-                                         |                  |                   |            |                    |               |                       |            |                    |                       |              |              |               |                    |                  |                       |
| Squat                                                                                                                       | Ayeni et al.[21]                            | MRI / MRA                                   | LR+              | ✓                 | ✓          | ✓                  | ✓             | ✓                     | ✓          | ✓                  | ✓                     | ✓            | ✗            | ✓             | ✓ (LR+)<br>✗ (LR-) | ?                | ↓ (LR+)<br>↓↓ (LR-)   |
|                                                                                                                             |                                             |                                             | LR-              |                   |            |                    |               |                       |            |                    |                       |              |              |               |                    |                  |                       |
| Trochanteric tenderness                                                                                                     | Owusu-Akyaw et al.[17]                      | FAIS diagnosis*                             | LR+              | ?                 | ?          | ?                  | ✗             | ?                     | ?          | ✓                  | ✓                     | ✗            | ✗            | ✓             | ✓                  | ?                | ↓↓                    |
|                                                                                                                             |                                             |                                             | LR-              |                   |            |                    |               |                       |            |                    |                       |              |              |               |                    |                  |                       |
| Anterior impingement test                                                                                                   | Pålsson et al.[16]                          | Symptoms, X-Ray & Intra-articular injection | LR+              | ✓                 | ✓          | ✓                  | ✓             | ✓                     | ✓          | ✓                  | ✓                     | ✓            | ✗            | ✓             | ✓                  | ?                | ↓                     |
|                                                                                                                             |                                             |                                             | LR-              |                   |            |                    |               |                       |            |                    |                       |              |              |               |                    |                  |                       |
| DEXRIT or DIRIT***                                                                                                          | Pålsson et al.[16]                          | Symptoms, X-Ray & Intra-articular injection | LR+              | ✓                 | ✓          | ✓                  | ✓             | ✓                     | ✓          | ✓                  | ✓                     | ✓            | ✗            | ✓             | ✓                  | ?                | ↓                     |
|                                                                                                                             |                                             |                                             | LR-              |                   |            |                    |               |                       |            |                    |                       |              |              |               |                    |                  |                       |

| <b>Diagnosis</b>                                                                                                                   |                        |                                             |                  | <b>QUADAS 2</b>     |            |                    |               |                              |            |                    | <b>GRADE (outcome level)</b> |              |              |               |                    |                  |                       |
|------------------------------------------------------------------------------------------------------------------------------------|------------------------|---------------------------------------------|------------------|---------------------|------------|--------------------|---------------|------------------------------|------------|--------------------|------------------------------|--------------|--------------|---------------|--------------------|------------------|-----------------------|
| <b>Femoroacetabular Impingement (FAI)</b> (Studies where tests are diagnosing internal hip pathology specified as FAI and/or FAIS) |                        |                                             |                  | <b>Risk of Bias</b> |            |                    |               | <b>Applicability Concern</b> |            |                    |                              |              |              |               |                    |                  |                       |
| Index test                                                                                                                         | Study                  | Reference standard                          | Likelihood ratio | Patient Selection   | Index Test | Reference Standard | Flow & Timing | Patient Selection            | Index Test | Reference Standard | Study design                 | Risk of bias | Indirectness | Inconsistency | Imprecise evidence | Publication bias | Downgrade **          |
| Passive hip flexion                                                                                                                | Pålsson et al.[16]     | Symptoms, X-Ray & Intra-articular injection | LR+              | ✓                   | ✓          | ✓                  | ✓             | ✓                            | ✓          | ✓                  | ✓                            | ✓            | ✗            | ✓             | ✓                  | ?                | ↓                     |
|                                                                                                                                    |                        |                                             | LR-              |                     |            |                    |               |                              |            |                    |                              |              |              |               |                    |                  |                       |
| Internal rotation with 0 degrees hip flexion                                                                                       | Pålsson et al.[16]     | Symptoms, X-Ray & Intra-articular injection | LR+              | ✓                   | ✓          | ✓                  | ✓             | ✓                            | ✓          | ✓                  | ✓                            | ✓            | ✗            | ✓             | ✗ (LR+)<br>✓ (LR-) | ?                | ↓↓ (LR+)<br>↓ (LR-)   |
|                                                                                                                                    |                        |                                             | LR-              |                     |            |                    |               |                              |            |                    |                              |              |              |               |                    |                  |                       |
| External rotation with 90 degrees hip flexion                                                                                      | Pålsson et al.[16]     | Symptoms, X-Ray & Intra-articular injection | LR+              | ✓                   | ✓          | ✓                  | ✓             | ✓                            | ✓          | ✓                  | ✓                            | ✓            | ✗            | ✓             | ✓                  | ?                | ↓                     |
|                                                                                                                                    |                        |                                             | LR-              |                     |            |                    |               |                              |            |                    |                              |              |              |               |                    |                  |                       |
| Passive hip abduction                                                                                                              | Pålsson et al.[16]     | Symptoms, X-Ray & Intra-articular injection | LR+              | ✓                   | ✓          | ✓                  | ✓             | ✓                            | ✓          | ✓                  | ✓                            | ✓            | ✗            | ✓             | ✓                  | ?                | ↓                     |
|                                                                                                                                    |                        |                                             | LR-              |                     |            |                    |               |                              |            |                    |                              |              |              |               |                    |                  |                       |
| Foot Progression Angle Walking                                                                                                     | Ranawat et al.[15]     | Symptoms, X-Ray & Intra-articular injection | LR+              | ✓                   | ✓          | ✓                  | ✓             | ✓                            | ✓          | ✓                  | ✓                            | ✓            | ✗            | ✓             | ✓                  | ?                | ↓                     |
|                                                                                                                                    |                        |                                             | LR-              |                     |            |                    |               |                              |            |                    |                              |              |              |               |                    |                  |                       |
| Pain with passive hip extension                                                                                                    | Owusu-Akyaw et al.[17] | FAIS diagnosis*                             | LR+              | ?                   | ?          | ?                  | ✗             | ?                            | ?          | ✓                  | ✓                            | ✗            | ✗            | ✓             | ✗ (LR+)<br>✓ (LR-) | ?                | ↓↓↓ (LR+)<br>↓↓ (LR-) |
|                                                                                                                                    |                        |                                             | LR-              |                     |            |                    |               |                              |            |                    |                              |              |              |               |                    |                  |                       |
| Resisted hip abduction                                                                                                             | Owusu-Akyaw et al.[17] | FAIS diagnosis*                             | LR+              | ?                   | ?          | ?                  | ✗             | ?                            | ?          | ✓                  | ✓                            | ✗            | ✗            | ✓             | ✓                  | ?                | ↓↓                    |
|                                                                                                                                    |                        |                                             | LR-              |                     |            |                    |               |                              |            |                    |                              |              |              |               |                    |                  |                       |
| Bilateral resisted hip adduction                                                                                                   | Owusu-Akyaw et al.[17] | FAIS diagnosis*                             | LR+              | ?                   | ?          | ?                  | ✗             | ?                            | ?          | ✓                  | ✓                            | ✗            | ✗            | ✓             | ✓                  | ?                | ↓↓                    |
|                                                                                                                                    |                        |                                             | LR-              |                     |            |                    |               |                              |            |                    |                              |              |              |               |                    |                  |                       |
| Resisted External Derotation                                                                                                       | Owusu-Akyaw et al.[17] | FAIS diagnosis*                             | LR+              | ?                   | ?          | ?                  | ✗             | ?                            | ?          | ✓                  | ✓                            | ✗            | ✗            | ✓             | ✓                  | ?                | ↓↓                    |
|                                                                                                                                    |                        |                                             | LR-              |                     |            |                    |               |                              |            |                    |                              |              |              |               |                    |                  |                       |
| Thomas test                                                                                                                        | Owusu-Akyaw et al.[17] | FAIS diagnosis*                             | LR+              | ?                   | ?          | ?                  | ✗             | ?                            | ?          | ✓                  | ✓                            | ✗            | ✗            | ✓             | ✓                  | ?                | ↓↓                    |
|                                                                                                                                    |                        |                                             | LR-              |                     |            |                    |               |                              |            |                    |                              |              |              |               |                    |                  |                       |
| Log Roll                                                                                                                           | Owusu-Akyaw et al.[17] | FAIS diagnosis*                             | LR+              | ?                   | ?          | ?                  | ✗             | ?                            | ?          | ✓                  | ✓                            | ✗            | ✗            | ✓             | ✓                  | ?                | ↓↓                    |
|                                                                                                                                    |                        |                                             | LR-              |                     |            |                    |               |                              |            |                    |                              |              |              |               |                    |                  |                       |
| “Clicking or Catching”                                                                                                             | Owusu-Akyaw et al.[17] | FAIS diagnosis*                             | LR+              | ?                   | ?          | ?                  | ✗             | ?                            | ?          | ✓                  | ✓                            | ✗            | ✗            | ✓             | ✓                  | ?                | ↓↓                    |
|                                                                                                                                    |                        |                                             | LR-              |                     |            |                    |               |                              |            |                    |                              |              |              |               |                    |                  |                       |
| “Clicking”                                                                                                                         | Owusu-Akyaw et al.[17] | FAIS diagnosis*                             | LR+              | ?                   | ?          | ?                  | ✗             | ?                            | ?          | ✓                  | ✓                            | ✗            | ✗            | ✓             | ✓                  | ?                | ↓↓                    |
|                                                                                                                                    |                        |                                             | LR-              |                     |            |                    |               |                              |            |                    |                              |              |              |               |                    |                  |                       |
| “Catching”                                                                                                                         | Owusu-Akyaw et al.[17] | FAIS diagnosis*                             | LR+              | ?                   | ?          | ?                  | ✗             | ?                            | ?          | ✓                  | ✓                            | ✗            | ✗            | ✓             | ✓                  | ?                | ↓↓                    |
|                                                                                                                                    |                        |                                             | LR-              |                     |            |                    |               |                              |            |                    |                              |              |              |               |                    |                  |                       |
| “Pain when sitting”                                                                                                                | Owusu-Akyaw et al.[17] | FAIS diagnosis*                             | LR+              | ?                   | ?          | ?                  | ✗             | ?                            | ?          | ✓                  | ✓                            | ✗            | ✗            | ✓             | ✓                  | ?                | ↓↓                    |
|                                                                                                                                    |                        |                                             | LR-              |                     |            |                    |               |                              |            |                    |                              |              |              |               |                    |                  |                       |
| “Anterior/Groin/Hip Pain”                                                                                                          | Owusu-Akyaw et al.[17] | FAIS diagnosis*                             | LR+              | ?                   | ?          | ?                  | ✗             | ?                            | ?          | ✓                  | ✓                            | ✗            | ✗            | ✓             | ✓                  | ?                | ↓↓                    |
|                                                                                                                                    |                        |                                             | LR-              |                     |            |                    |               |                              |            |                    |                              |              |              |               |                    |                  |                       |

Abbreviations: MRI (magnetic resonance imaging); US (ultrasound); LR+ (Positive likelihood ratio); LR- (negative likelihood ratio); N/A (not applicable)

\*Item 1: Was a consecutive or random sample of patients enrolled? Item 2: Was a case-control design avoided? Item 3: Did the study avoid inappropriate exclusions? Item 4: Were the index test results interpreted without knowledge of the results of the reference standard? Item 5: If a threshold was used, was it pre-specified? Item 6: Is the reference standard likely to correctly classify the target condition? Item 7: Were the reference standard results interpreted without knowledge of the results of the index test? Item 8: Was there an appropriate interval between index test(s) and reference standard? Item 9: Did all patients receive a reference standard? Item 10: Did patients receive the same reference standard? Item 11: Were all patients included in the analysis?

Quadas 2 risk of bias assessment: ✗ = item not fulfilled; ✓ = item fulfilled; ? = unclear or unknown if item is fulfilled

GRADE assessments: ✗ = item cause for possible downgrade once; ✗✗ = item cause for possible downgrade twice; ✓ = item fulfilled, no downgrading; ? = item unclear or not available, no upgrading or downgrading.

\*\* ↓ = downgrade quality by one level; ↓↓ = downgrade quality by two levels; ↓↓↓ = downgrade quality by three levels; ↔ = no downgrade

**Table 3. Risk of bias assessment and GRADE of clinical tests for diagnosing acetabular labral tear**

| Diagnosis                                                                                              |                         |                    |                  | QUADAS 2          |            |                    |               |                       |            |                    | GRADE (outcome level) |              |              |                    |                    |                  |             |
|--------------------------------------------------------------------------------------------------------|-------------------------|--------------------|------------------|-------------------|------------|--------------------|---------------|-----------------------|------------|--------------------|-----------------------|--------------|--------------|--------------------|--------------------|------------------|-------------|
| Acetabular Labral Tear (ALT) (Studies where tests are diagnosing internal hip pathology specified ALT) |                         |                    |                  | Risk of Bias      |            |                    |               | Applicability Concern |            |                    | GRADE (outcome level) |              |              |                    |                    |                  |             |
| Index test                                                                                             | Study                   | Reference standard | Likelihood ratio | Patient Selection | Index Test | Reference Standard | Flow & Timing | Patient Selection     | Index Test | Reference Standard | Study design          | Risk of bias | Indirectness | Inconsistency      | Imprecise evidence | Publication bias | Downgrade** |
| FADIR                                                                                                  | Sink et al.[14]         | MRI                | LR+              | ✓                 | ✓          | ✗                  | ✗             | ✓                     | ✓          | ✓                  | ✓                     | ✗✗           | ✗            | ✗                  | ✗                  | ✓                | ↓↓↓         |
|                                                                                                        |                         |                    | LR-              | ✓                 | ✓          | ✗                  | ✗             | ✓                     |            |                    |                       |              |              |                    |                    |                  |             |
|                                                                                                        | Beaule et al.[22]       | MRA                | LR+              | ✗                 | ✗          | ✗                  | ✓             | ✗                     | ✓          | ✗                  |                       |              |              |                    |                    |                  |             |
|                                                                                                        |                         |                    | LR-              | ✗                 | ✗          | ✗                  | ✓             | ✗                     | ✗          |                    |                       |              |              |                    |                    |                  |             |
|                                                                                                        | Keeney et al.[3]        | MRA                | LR+              | ✓                 | ✗          | ✓                  | ✗             | ✓                     | ✓          | ✓                  |                       |              |              |                    |                    |                  |             |
|                                                                                                        |                         |                    | LR-              | ✓                 | ✗          | ✓                  | ✗             | ✓                     | ✓          |                    |                       |              |              |                    |                    |                  |             |
|                                                                                                        | Laude et al.[6]         | Surgery            | LR+              | ✗                 | ✗          | ✗                  | ✓             | ✗                     | ✓          | ✓                  |                       |              |              |                    |                    |                  |             |
| LR-                                                                                                    |                         |                    | ✗                | ✗                 | ✗          | ✓                  | ✓             | ✓                     |            |                    |                       |              |              |                    |                    |                  |             |
| Leunig et al.[8]                                                                                       | Surgery                 | LR+                | ✗                | ✗                 | ✗          | ✓                  | ✓             | ✓                     | ✓          |                    |                       |              |              |                    |                    |                  |             |
|                                                                                                        |                         | LR-                | ✗                | ✗                 | ✗          | ✓                  | ✓             | ✓                     |            |                    |                       |              |              |                    |                    |                  |             |
| Troelsen et al.[4]                                                                                     | MRA                     | LR+                | ✗                | ✓                 | ✓          | ?                  | ✓             | ✓                     | ✓          |                    |                       |              |              |                    |                    |                  |             |
|                                                                                                        |                         | LR-                | ✗                | ✓                 | ✓          | ?                  | ✓             | ✓                     |            |                    |                       |              |              |                    |                    |                  |             |
| Wang et al.[23]                                                                                        | X-ray                   | LR+                | ✓                | ✗                 | ✗          | ?                  | ✓             | ✓                     | ✓          |                    |                       |              |              |                    |                    |                  |             |
|                                                                                                        |                         | LR-                | ✓                | ✗                 | ✗          | ?                  | ✓             | ✓                     |            |                    |                       |              |              |                    |                    |                  |             |
| Flexion Internal Rotation test                                                                         | Reiman et al.[1]        | Surgery            | LR+              | ✓                 | ✓          | ✗                  | ✗             | ✓                     | ✓          | ✓                  | ✓                     | ✗            | ✗            | ✓ (LR+)<br>✓ (LR+) | ✗ (LR+)<br>✗ (LR-) | ✓                | ↓↓↓         |
|                                                                                                        |                         |                    | LR-              | ✓                 | ✓          | ✗                  | ✗             | ✓                     |            |                    |                       |              |              |                    |                    |                  |             |
|                                                                                                        | Petersilge et al.[25]   | Surgery            | LR+              | ✗                 | ✓          | ✗                  | ✗             | ✓                     | ✓          | ✓                  |                       |              |              |                    |                    |                  |             |
| Chan et al.[24]                                                                                        | MRA                     | LR+                | ✓                | ✓                 | ✗          | ✗                  | ✓             | ✓                     | ✓          |                    |                       |              |              |                    |                    |                  |             |
|                                                                                                        |                         | LR-                | ✓                | ✓                 | ✗          | ✗                  | ✓             | ✓                     |            |                    |                       |              |              |                    |                    |                  |             |
| FABER                                                                                                  | Troelsen et al.[4]      | MRA                | LR+              | ✗                 | ✓          | ✓                  | ?             | ✓                     | ✓          | ✓                  | ✓                     | ✗            | ✗            | ?                  | ✗                  | ?                | ↓↓          |
|                                                                                                        |                         |                    | LR-              | ✗                 | ✓          | ✓                  | ?             | ✓                     | ✓          |                    |                       |              |              |                    |                    |                  |             |
| THIRD test                                                                                             | Myrick & Nissen.[26]    | Surgery            | LR+              | ✗                 | ?          | ✗                  | ?             | ?                     | ✗          | ✓                  | ✓                     | ✗            | ✗            | ?                  | ✗ (LR+)<br>✗ (LR-) | ?                | ↓↓↓ (LR+)   |
|                                                                                                        |                         |                    | LR-              | ✗                 | ?          | ✗                  | ?             | ?                     | ✗          | ✓                  |                       |              |              |                    |                    |                  | ↓↓↓ (LR-)   |
| Thomas Test                                                                                            | McCarthy & Busconi.[27] | Surgery            | LR+              | ✗                 | ✗          | ✗                  | ✓             | ✓                     | ✗          | ✗                  | ✓                     | ✗            | ✗            | ✗ (LR+)<br>✗ (LR-) | ✗                  | ✓                | ↓↓↓         |
|                                                                                                        |                         |                    | LR-              | ✗                 | ✗          | ✗                  | ✓             | ✗                     | ✗          |                    |                       |              |              |                    |                    |                  |             |
| Tijssen et al.[11]                                                                                     | Surgery                 | LR+                | ✓                | ✓                 | ?          | ?                  | ✓             | ✓                     | ✓          |                    |                       |              |              |                    |                    |                  |             |
|                                                                                                        |                         | LR-                | ✓                | ✓                 | ?          | ?                  | ✓             | ✓                     |            |                    |                       |              |              |                    |                    |                  |             |
| Internal rotation-flexion-axial compression test                                                       | Narvani et al.[28]      | MRA                | LR+              | ✗                 | ✗          | ✗                  | ?             | ✓                     | ✓          | ✓                  | ✓                     | ✗            | ✗            | ?                  | ✗                  | ?                | ↓↓↓         |
|                                                                                                        |                         |                    | LR-              | ✗                 | ✗          | ✗                  | ?             | ✓                     | ✓          |                    |                       |              |              |                    |                    |                  |             |

| Table 3 continued. Risk of bias assessment and GRADE of clinical tests for diagnosing acetabular labral tear |                         |                    |                  |                   |            |                    |               |                       |            |                    |                       |              |              |               |                    |                  |              |
|--------------------------------------------------------------------------------------------------------------|-------------------------|--------------------|------------------|-------------------|------------|--------------------|---------------|-----------------------|------------|--------------------|-----------------------|--------------|--------------|---------------|--------------------|------------------|--------------|
| Diagnosis                                                                                                    |                         |                    |                  | QUADAS 2          |            |                    |               |                       |            |                    | GRADE (outcome level) |              |              |               |                    |                  |              |
| Femoroacetabular Impingement (FAI)                                                                           |                         |                    |                  | Risk of Bias      |            |                    |               | Applicability Concern |            |                    |                       |              |              |               |                    |                  |              |
| Index test                                                                                                   | Study                   | Reference standard | Likelihood ratio | Patient Selection | Index Test | Reference Standard | Flow & Timing | Patient Selection     | Index Test | Reference Standard | Study design          | Risk of bias | Indirectness | Inconsistency | Imprecise evidence | Publication bias | Downgrade ** |
| "Clicking"                                                                                                   | Narvani et al.[28]      | MRA                | LR+              | ×                 | ×          | ×                  | ?             | ✓                     | ✓          | ✓                  | ✓                     | ××           | ×            | ✓             | ×                  | ✓                | ↓↓↓          |
|                                                                                                              |                         |                    | LR-              | ×                 | ×          | ×                  | ✓             | ×                     | ×          |                    |                       |              |              |               |                    |                  |              |
|                                                                                                              | McCarthy & Busconi.[27] | Surgery            | LR+              | ×                 | ×          | ×                  | ✓             | ✓                     | ×          | ×                  |                       |              |              |               |                    |                  |              |
|                                                                                                              | Tijssen et al.[11]      | Surgery            | LR+              | ✓                 | ✓          | ?                  | ?             | ✓                     | ✓          | ✓                  |                       |              |              |               |                    |                  |              |
|                                                                                                              |                         |                    | LR-              | ✓                 | ✓          | ?                  | ?             | ✓                     | ✓          | ✓                  |                       |              |              |               |                    |                  |              |
| "Locking"                                                                                                    | McCarthy & Busconi.[27] | Surgery            | LR+              | ×                 | ×          | ×                  | ✓             | ✓                     | ×          | ×                  | ✓                     | ××           | ×            | ✓             | ✓                  | ?                | ↓↓↓          |
|                                                                                                              |                         |                    | LR-              | ×                 | ×          | ×                  | ✓             | ✓                     | ×          | ×                  | ✓                     | ××           | ×            | ?             | ✓ (LR+)            | ?                | ↓↓↓          |
| "Anterior groin pain"                                                                                        | McCarthy & Busconi.[27] | Surgery            | LR+              | ×                 | ×          | ×                  | ✓             | ✓                     | ×          | ×                  | ✓                     | ××           | ×            | ?             | × (LR-)            | ?                | ↓↓↓          |
|                                                                                                              |                         |                    | LR-              | ×                 | ×          | ×                  | ✓             | ✓                     | ×          | ×                  | ✓                     | ××           | ×            | ?             | ✓                  | ?                | ↓↓↓          |
| "Giving way"                                                                                                 | McCarthy & Busconi.[27] | Surgery            | LR+              | ×                 | ×          | ×                  | ✓             | ✓                     | ×          | ×                  | ✓                     | ××           | ×            | ?             | ✓                  | ?                | ↓↓↓          |
|                                                                                                              |                         |                    | LR-              | ×                 | ×          | ×                  | ✓             | ✓                     | ×          | ×                  | ✓                     | ××           | ×            | ?             | ✓                  | ?                | ↓↓↓          |

Abbreviations: MRI (magnetic resonance imaging); US (ultrasound); LR+ (Positive likelihood ratio); LR- (negative likelihood ratio); N/A (not applicable)

\*Item 1: Was a consecutive or random sample of patients enrolled? Item 2: Was a case-control design avoided? Item 3: Did the study avoid inappropriate exclusions? Item 4: Were the index test results interpreted without knowledge of the results of the reference standard? Item 5: If a threshold was used, was it pre-specified? Item 6: Is the reference standard likely to correctly classify the target condition? Item 7: Were the reference standard results interpreted without knowledge of the results of the index test? Item 8: Was there an appropriate interval between index test(s) and reference standard? Item 9: Did all patients receive a reference standard? Item 10: Did patients receive the same reference standard? Item 11: Were all patients included in the analysis?

Quadas 2 risk of bias assessment: × item not fulfilled; ✓ = item fulfilled; ? unclear or unknown if item is fulfilled

GRADE assessments: × = item cause for possible downgrade once; ×× = item cause for possible downgrade twice; ✓ = item fulfilled, no downgrading; ? = item unclear or not available, no upgrading or downgrading.

\*\*↓ = downgrade quality by one level; ↓↓ = downgrade quality by two levels; ↓↓↓ = downgrade quality by three levels; ↔ = no downgrade

| Treatment of femoroacetabular impingement / labral tear                                |                          | Risk of Bias 2.0 Domain * |   |   |   |   |         | GRADE (outcome level)         |              |              |                                                                                              |                                                  |                                                                                   |                  |             |
|----------------------------------------------------------------------------------------|--------------------------|---------------------------|---|---|---|---|---------|-------------------------------|--------------|--------------|----------------------------------------------------------------------------------------------|--------------------------------------------------|-----------------------------------------------------------------------------------|------------------|-------------|
| Interventions                                                                          | Study                    | 1                         | 2 | 3 | 4 | 5 | Overall | Outcome                       | Study design | Risk of bias | Inconsistency                                                                                | Indirectness                                     | Imprecise evidence                                                                | Publication bias | Downgrade** |
| Hip arthroscopy versus physiotherapy / non-operative care                              | Mansell et al.[29]       | ✓                         | ? | ✓ | ✗ | ✓ | ✗       | iHOT-33 @ 12 months           | RCT ✓        | ?            | ✓<br>(No effect in Mansell, however low I <sup>2</sup> and overlapping confidence intervals) | ✓                                                | ✗<br>(Wide confidence interval, with lower part not exceeding clinical relevance) | ?                | ↓           |
|                                                                                        | Griffin et al.[30]       | ✓                         | ? | ? | ? | ✓ | ?       | iHOT-33 @ 12 months           | RCT ✓        |              |                                                                                              |                                                  |                                                                                   |                  |             |
|                                                                                        | Palmer et al.[31]        | ?                         | ? | ✓ | ? | ✓ | ?       | iHOT-33 @ 8 months            | RCT ✓        |              |                                                                                              |                                                  |                                                                                   |                  |             |
| Hip arthroscopy versus physiotherapy / non-operative care                              | Mansell et al.[29]       | ✓                         | ? | ✓ | ✗ | ✓ | ✗       | iHOT-33 @ 24 months           | RCT ✓        | ✗            | ?                                                                                            | ✓ (but very selected population – military)      | ✗                                                                                 | ?                | ↓↓          |
| 8 weeks core and hip training versus only hip training                                 | Aoyama et al. [32]       | ✗                         | ? | ✗ | ? | ? | ✗       | iHOT-12 @ 8 weeks             | RCT ✓        | ✗            | ?                                                                                            | ✗<br>(Only females included)                     | ✗                                                                                 | ?                | ↓↓↓         |
| 12 weeks of “movement pattern” training versus usual rehabilitation                    | Harris-Hayes et al.[33]  | ✗                         | ? | ? | ✗ | ? | ✗       | HOOS @ 13 weeks               | RCT ✓        | ✗            | ?                                                                                            | ✗<br>(No measures of morphology and use of HOOS) | ✓                                                                                 | ?                | ↓↓          |
| 6 weeks of manual therapy and supervised physiotherapy versus advice and home exercise | Wright et al.[34]        | ?                         | ? | ✗ | ✗ | ? | ✗       | HOS @ 7 weeks                 | RCT ✓        | ✗            | ?                                                                                            | ✗<br>(use of HOS)                                | ✗                                                                                 | ?                | ↓↓↓         |
| Prescribed physiotherapy/training versus passive modalities                            | Smeatham et al.[35]      | ?                         | ? | ✗ | ✗ | ? | ✗       | NAHS @ 3 months               | RCT ✓        | ✗            | ✓                                                                                            | ✓<br>(But, use of NAHS in one study)             | ✗                                                                                 | ?                | ↓↓          |
|                                                                                        | Kemp et al.[36]          | ✓                         | ? | ✗ | ✓ | ? | ✗       | iHOT-33 @ 12 weeks            | RCT ✓        |              |                                                                                              |                                                  |                                                                                   |                  |             |
| Prescribed physiotherapy/training versus passive modalities                            | Harries-Hayes et al.[37] | ✓                         | ? | ✓ | ✗ | ? | ✗       | HOOS @ 6 weeks                | RCT ✓        | ✗            | ?                                                                                            | ✗<br>(No measures of morphology and use of HOOS) | ✗                                                                                 | ?                | ↓↓↓         |
| Post-operative rehabilitation versus advice only                                       | Bennell et al.[38]       | ✓                         | ✗ | ? | ✗ | ✓ | ✗       | iHOT-33 @ 14 weeks            | RCT ✓        | ✗            | ✓                                                                                            | ✓                                                | ✗                                                                                 | ?                | ↓↓          |
|                                                                                        | Kemp et al.[39]          | ✓                         | ? | ✓ | ? | ? | ?       | iHOT-33 @ 12 weeks            | RCT ✓        |              |                                                                                              |                                                  |                                                                                   |                  |             |
| Post-operative rehabilitation versus advice only                                       | Bennell et al.[38]       | ✓                         | ✗ | ? | ✗ | ✓ | ✗       | iHOT-33 @ 24 weeks            | RCT ✓        | ✗            | ?                                                                                            | ✓                                                | ✗                                                                                 | ?                | ↓↓          |
| Physiotherapy prior to surgery (pre-habilitation) versus massage                       | Grant et al.[40]         | ?                         | ? | ✓ | ✗ | ? | ✗       | NAHS @ 12 weeks after surgery | RCT ✓        | ✗            | ?                                                                                            | ✗<br>(use of NAHS)                               | ✗<br>(Only 8 in each group)                                                       | ?                | ↓↓↓         |

Abbreviations: RCT (randomized controlled trial)

\*Domain 1: Risk of bias arising from the randomization process; Domain 2: Risk of bias due to deviations from the intended interventions (effect of assignment to intervention); Domain 3: Missing outcome data; Domain 4: Risk of bias in measurement of the outcome; Domain 5: Risk of bias in selection of the reported result.

Risk-of-bias judgement: ✗ High; ✓ = Low; ? Some concern

GRADE assessments: ✗ = item cause for possible downgrade once; ✗✗ = item cause for possible downgrade twice; ✓ = item fulfilled, no downgrading; ? = item unclear or not available, no upgrading or downgrading.

\*\* ↓ = downgrade quality by one level; ↓↓ = downgrade quality by two levels; ↓↓↓ = downgrade quality by three levels; ↔ = no downgrade

## ROBIS: Tool to assess risk of bias in systematic reviews

Table 11. Suggested Tabular Presentation for ROBIS Results

| Review                | Phase 2                       |                                            |                                        |                           | Phase 3                    |
|-----------------------|-------------------------------|--------------------------------------------|----------------------------------------|---------------------------|----------------------------|
|                       | 1. STUDY ELIGIBILITY CRITERIA | 2. IDENTIFICATION AND SELECTION OF STUDIES | 3. DATA COLLECTION AND STUDY APPRAISAL | 4. SYNTHESIS AND FINDINGS | RISK OF BIAS IN THE REVIEW |
| Burgess et al.[41]    | 😊                             | 😞                                          | 😊                                      | 😊                         | ?                          |
| Reiman et al.[1]      | 😊                             | 😞                                          | 😊                                      | 😞                         | 😊                          |
| Caliesch et al.[42]   | 😊                             | 😊                                          | 😊                                      | 😞                         | ?                          |
| Casartelli et al.[43] | 😊                             | 😞                                          | 😊                                      | 😞                         | 😊                          |
| Kemp et al.[44]       | 😊                             | 😞                                          | 😊                                      | 😞                         | 😊                          |

😊 = low risk; 😞 = high risk; ? = unclear risk

## REFERENCES

- 1 Reiman MP, Goode AP, Cook CE, *et al.* Diagnostic accuracy of clinical tests for the diagnosis of hip femoroacetabular impingement/labral tear: a systematic review with meta-analysis. *Br J Sports Med* 2015;**49**:811. doi:10.1136/bjsports-2014-094302
- 2 Aprato A, Massè A, Faletti C, *et al.* Magnetic resonance arthrography for femoroacetabular impingement surgery: is it reliable? *J Orthop Traumatol Off J Ital Soc Orthop Traumatol* 2013;**14**:201–6. doi:10.1007/s10195-013-0227-1
- 3 Keeney JA, Peelle MW, Jackson J, *et al.* Magnetic resonance arthrography versus arthroscopy in the evaluation of articular hip pathology. *Clin Orthop* 2004;:163–9. doi:10.1097/01.blo.0000150125.34906.7d
- 4 Troelsen A, Mechlenburg I, Gelineck J, *et al.* What is the role of clinical tests and ultrasound in acetabular labral tear diagnostics? *Acta Orthop* 2009;**80**:314–8. doi:10.3109/17453670902988402
- 5 Beaulé PE, Zaragoza E, Motamedi K, *et al.* Three-dimensional computed tomography of the hip in the assessment of femoroacetabular impingement. *J Orthop Res Off Publ Orthop Res Soc* 2005;**23**:1286–92. doi:10.1016/j.orthres.2005.03.011.1100230608
- 6 Laude F, Sariali E, Nogier A. Femoroacetabular impingement treatment using arthroscopy and anterior approach. *Clin Orthop* 2009;**467**:747–52. doi:10.1007/s11999-008-0656-y
- 7 Peters CL, Schabel K, Anderson L, *et al.* Open treatment of femoroacetabular impingement is associated with clinical improvement and low complication rate at short-term followup. *Clin Orthop* 2010;**468**:504–10. doi:10.1007/s11999-009-1152-8
- 8 Leunig M, Werlen S, Ungersböck A, *et al.* Evaluation of the acetabular labrum by MR arthrography. *J Bone Joint Surg Br* 1997;**79**:230–4. doi:10.1302/0301-620x.79b2.7288
- 9 Martin RL, Irrgang JJ, Sekiya JK. The diagnostic accuracy of a clinical examination in determining intra-articular hip pain for potential hip arthroscopy candidates. *Arthroscopy* 2008;**24**:1013–8. doi:10.1016/j.arthro.2008.04.075
- 10 Maslowski E, Sullivan W, Forster Harwood J, *et al.* The diagnostic validity of hip provocation maneuvers to detect intra-articular hip pathology. *PM R* 2010;**2**:174–81. doi:10.1016/j.pmrj.2010.01.014
- 11 Tijssen M, van Cingel RE, de Visser E, *et al.* Hip joint pathology: relationship between patient history, physical tests, and arthroscopy findings in clinical practice. *Scand J Med Sci Sports* 2017;**27**:342–50. doi:10.1111/sms.12651
- 12 Domayer SE, Ziebarth K, Chan J, *et al.* Femoroacetabular cam-type impingement: diagnostic sensitivity and specificity of radiographic views compared to radial MRI. *Eur J Radiol* 2011;**80**:805–10. doi:10.1016/j.ejrad.2010.10.016
- 13 Hananouchi T, Yasui Y, Yamamoto K, *et al.* Anterior impingement test for labral lesions has high positive predictive value. *Clin Orthop* 2012;**470**:3524–9. doi:10.1007/s11999-012-2450-0
- 14 Sink EL, Gralla J, Ryba A, *et al.* Clinical presentation of femoroacetabular impingement in adolescents. *J Pediatr Orthop* 2008;**28**:806–11. doi:10.1097/BPO.0b013e31818e194f
- 15 Ranawat AS, Gaudiani MA, Slullitel PA, *et al.* Foot Progression Angle Walking Test: A Dynamic Diagnostic Assessment for Femoroacetabular Impingement and Hip Instability. *Orthop J Sports Med* 2017;**5**:2325967116679641. doi:10.1177/2325967116679641
- 16 Pålsson A, Kostogiannis I, Ageberg E. Combining results from hip impingement and range of motion tests can increase diagnostic accuracy in patients with FAI syndrome. *Knee Surg Sports Traumatol Arthrosc Off J ESSKA* Published Online First: 25 April 2020. doi:10.1007/s00167-020-06005-5
- 17 Owusu-Akyaw KA, Hutyra CA, Evanson RJ, *et al.* Concurrent validity of a patient self-administered examination and a clinical examination for femoroacetabular impingement syndrome. *BMJ Open Sport Exerc Med* 2019;**5**:e000574. doi:10.1136/bmjsem-2019-000574

- 18 Barton C, Salineros MJ, Rakhra KS, *et al.* Validity of the alpha angle measurement on plain radiographs in the evaluation of cam-type femoroacetabular impingement. *Clin Orthop* 2011;**469**:464–9. doi:10.1007/s11999-010-1624-x
- 19 Nogier A, Bonin N, May O, *et al.* Descriptive epidemiology of mechanical hip pathology in adults under 50 years of age. Prospective series of 292 cases: Clinical and radiological aspects and physiopathological review. *Orthop Traumatol Surg Res OTSR* 2010;**96**:S53-58. doi:10.1016/j.otsr.2010.09.005
- 20 Trindade CAC, Briggs KK, Fagotti L, *et al.* Positive FABER distance test is associated with higher alpha angle in symptomatic patients. *Knee Surg Sports Traumatol Arthrosc Off J ESSKA* 2019;**27**:3158–61. doi:10.1007/s00167-018-5031-2
- 21 Ayeni O, Chu R, Hetaimish B, *et al.* A painful squat test provides limited diagnostic utility in CAM-type femoroacetabular impingement. *Knee Surg Sports Traumatol Arthrosc Off J ESSKA* 2014;**22**:806–11. doi:10.1007/s00167-013-2668-8
- 22 Beaulé PE, Zaragoza E, Motamedi K, *et al.* Three-dimensional computed tomography of the hip in the assessment of femoroacetabular impingement. *J Orthop Res* 2005;**23**:1286–92. doi:10.1016/j.orthres.2005.03.011.1100230608
- 23 Wang W, Yue D, Zhang N, *et al.* Clinical diagnosis and arthroscopic treatment of acetabular labral tears. *Orthop Surg* 2011;**3**:28–34. doi:10.1111/j.1757-7861.2010.00121.x
- 24 Chan Y-S, Lien L-C, Hsu H-L, *et al.* Evaluating hip labral tears using magnetic resonance arthrography: a prospective study comparing hip arthroscopy and magnetic resonance arthrography diagnosis. *Arthrosc J Arthrosc Relat Surg Off Publ Arthrosc Assoc N Am Int Arthrosc Assoc* 2005;**21**:1250. doi:10.1016/j.arthro.2005.07.007
- 25 Petersilge CA, Haque MA, Petersilge WJ, *et al.* Acetabular labral tears: evaluation with MR arthrography. *Radiology* 1996;**200**:231–5. doi:10.1148/radiology.200.1.8657917
- 26 Myrick KM, Nissen CW. THIRD Test: Diagnosing Hip Labral Tears With a New Physical Examination Technique. *J Nurse Pract* 2013;**9**:501–5. doi:10.1016/j.nurpra.2013.06.008
- 27 McCarthy JC, Busconi B. The role of hip arthroscopy in the diagnosis and treatment of hip disease. *Orthopedics* 1995;**18**:753–6.
- 28 Narvani AA, Tsiridis E, Kendall S, *et al.* A preliminary report on prevalence of acetabular labrum tears in sports patients with groin pain. *Knee Surg Sports Traumatol Arthrosc* 2003;**11**:403–8. doi:10.1007/s00167-003-0390-7
- 29 Mansell NS, Rhon DI, Meyer J, *et al.* Arthroscopic Surgery or Physical Therapy for Patients With Femoroacetabular Impingement Syndrome: A Randomized Controlled Trial With 2-Year Follow-up. *Am J Sports Med* 2018;**46**:1306–14. doi:10.1177/0363546517751912
- 30 Griffin DR, Dickenson EJ, Wall PDH, *et al.* Hip arthroscopy versus best conservative care for the treatment of femoroacetabular impingement syndrome (UK FASHION): a multicentre randomised controlled trial. *The Lancet* 2018;**391**:2225–35. doi:10.1016/S0140-6736(18)31202-9
- 31 Palmer AJR, Gupta VA, Fernquest S, *et al.* Arthroscopic hip surgery compared with physiotherapy and activity modification for the treatment of symptomatic femoroacetabular impingement: multicentre randomised controlled trial. 2019;:13.
- 32 Aoyama M, Ohnishi Y, Utsunomiya H, *et al.* A Prospective, Randomized, Controlled Trial Comparing Conservative Treatment With Trunk Stabilization Exercise to Standard Hip Muscle Exercise for Treating Femoroacetabular Impingement: A Pilot Study. *Clin J Sport Med* 2019;**29**:267–75. doi:10.1097/JSM.0000000000000516
- 33 Harris-Hayes M, Steger-May K, Bove AM, *et al.* Movement pattern training compared with standard strengthening and flexibility among patients with hip-related groin pain: results of a pilot multicentre randomised clinical trial. *BMJ Open Sport Exerc Med* 2020;**6**:e000707. doi:10.1136/bmjsem-2019-000707
- 34 Wright AA, Hegedus EJ, Taylor JB, *et al.* Non-operative management of femoroacetabular impingement: A prospective, randomized controlled clinical trial pilot study. *J Sci Med Sport* 2016;**19**:716–21. doi:10.1016/j.jsams.2015.11.008

- 35 Smeatham A, Powell R, Moore S, *et al.* Does treatment by a specialist physiotherapist change pain and function in young adults with symptoms from femoroacetabular impingement? A pilot project for a randomised controlled trial. *Physiotherapy* 2017;**103**:201–7. doi:10.1016/j.physio.2016.02.004
- 36 Kemp JL, Coburn SL, Jones DM, *et al.* The Physiotherapy for Femoroacetabular Impingement Rehabilitation Study (physioFIRST): A Pilot Randomized Controlled Trial. *J Orthop Sports Phys Ther* 2018;**48**:307–15. doi:10.2519/jospt.2018.7941
- 37 Harris-Hayes M, Czuppon S, Van Dillen LR, *et al.* Movement-Pattern Training to Improve Function in People With Chronic Hip Joint Pain: A Feasibility Randomized Clinical Trial. *J Orthop Sports Phys Ther* 2016;**46**:452–61. doi:10.2519/jospt.2016.6279
- 38 Bennell KL, Spiers L, Takla A, *et al.* Efficacy of adding a physiotherapy rehabilitation programme to arthroscopic management of femoroacetabular impingement syndrome: a randomised controlled trial (FAIR). *BMJ Open* 2017;**7**:e014658. doi:10.1136/bmjopen-2016-014658
- 39 Kemp J, Moore K, Fransen M, *et al.* A pilot randomised clinical trial of physiotherapy (manual therapy, exercise, and education) for early-onset hip osteoarthritis post-hip arthroscopy. *Pilot Feasibility Stud* 2018;**4**:16. doi:10.1186/s40814-017-0157-4
- 40 Grant LF, Cooper DJ, Conroy JL. The HAPI ‘Hip Arthroscopy Pre-habilitation Intervention’ study: does pre-habilitation affect outcomes in patients undergoing hip arthroscopy for femoroacetabular impingement? *J Hip Preserv Surg* 2017;;hnw046. doi:10.1093/jhps/hnw046
- 41 Burgess RM, Rushton A, Wright C, *et al.* The validity and accuracy of clinical diagnostic tests used to detect labral pathology of the hip: A systematic review. *Man Ther* 2011;**16**:318–26. doi:10.1016/j.math.2011.01.002
- 42 Caliesch R, Sattelmayer M, Reichenbach S, *et al.* Diagnostic accuracy of clinical tests for cam or pincer morphology in individuals with suspected FAI syndrome: a systematic review. *BMJ Open Sport Exerc Med* 2020;**6**:e000772. doi:10.1136/bmjsem-2020-000772
- 43 Casartelli NC, Valenzuela PL, Maffiuletti NA, *et al.* The effectiveness of hip arthroscopy for the treatment of femoroacetabular impingement syndrome: a meta-analysis of randomized controlled trials. *Arthritis Care Res* Published Online First: 27 April 2020. doi:10.1002/acr.24234
- 44 Kemp JL, Mosler AB, Hart H, *et al.* Improving function in people with hip-related pain: a systematic review and meta-analysis of physiotherapist-led interventions for hip-related pain. *Br J Sports Med* Published Online First: 5 May 2020. doi:10.1136/bjsports-2019-101690
