# Supplementary figures and images for: Femoroacetabular impingement syndrome and labral injuries: grading the evidence on diagnosis and non-operative treatment—a statement paper commissioned by the Danish Society of Sports Physical Therapy (DSSF)
Source: HighWire-hosted journal article supplement (doi:10.1136/bjsports-2021-104060), 2021-09-16

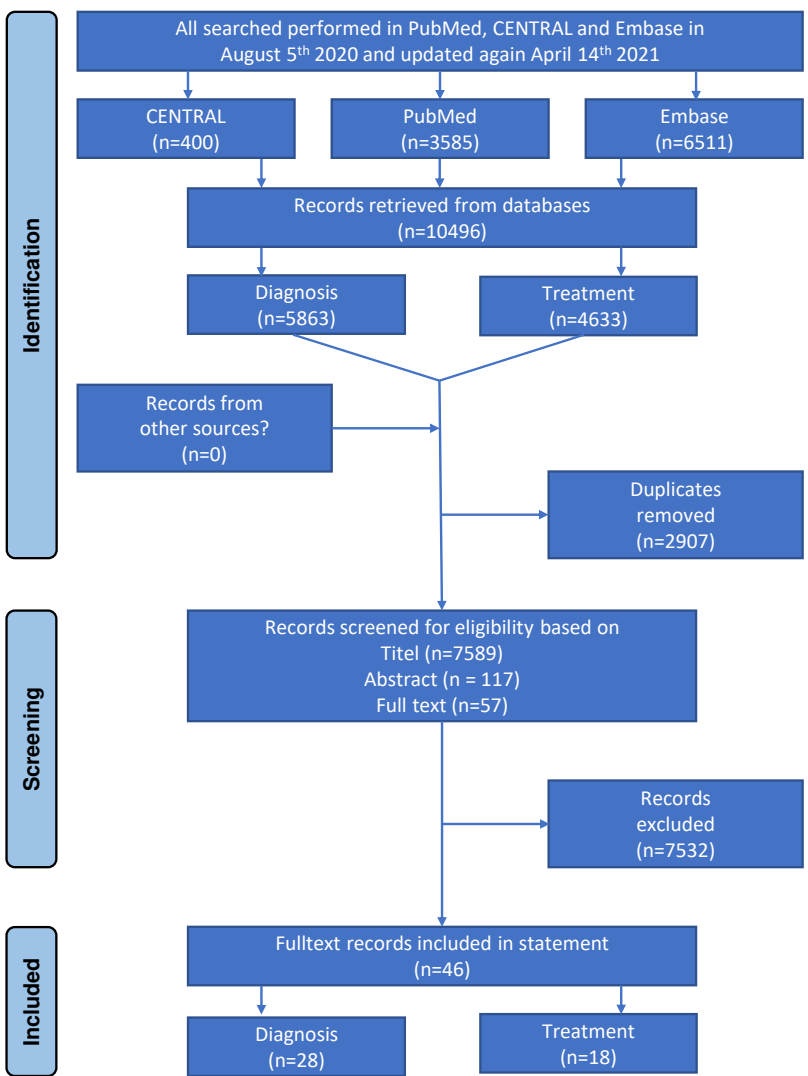

Supplement: bjsports-2021-104060supp001_data_supplement.pdf [file bjsports-2021-104060supp001_data_supplement.pdf]
